# Supplementary material for: Controllable synthesis and electrochemical hydrogen storage properties of Bi2Se3 architectural structures
Source: Royal Society of Chemistry journal article supplement (doi:10.1039/b924655j), 2010-01-01
Supplement: b924655j.pdf [file b924655j.pdf]

## Controllable synthesis and electrochemical hydrogen storage properties of $\text{Bi}_2\text{Se}_3$ architectural structures

Zhengliang Sun<sup>a,b</sup>, Shengcong Liufu<sup>a,\*</sup>, Xihong Chen<sup>a</sup>, Lidong Chen<sup>a</sup>

CAS Key laboratory of Materials for Energy Conversion, Shanghai Institute of Ceramics, Chinese Academy of Science, 1295 Dingxi Road, Shanghai 200050, PR China.

E-mail address: scliufu@hotmail.com

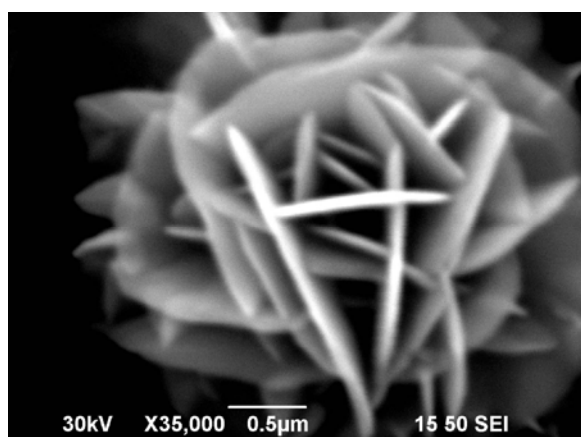

Figure S1 SEM of the rose-like pattern with high magnification.

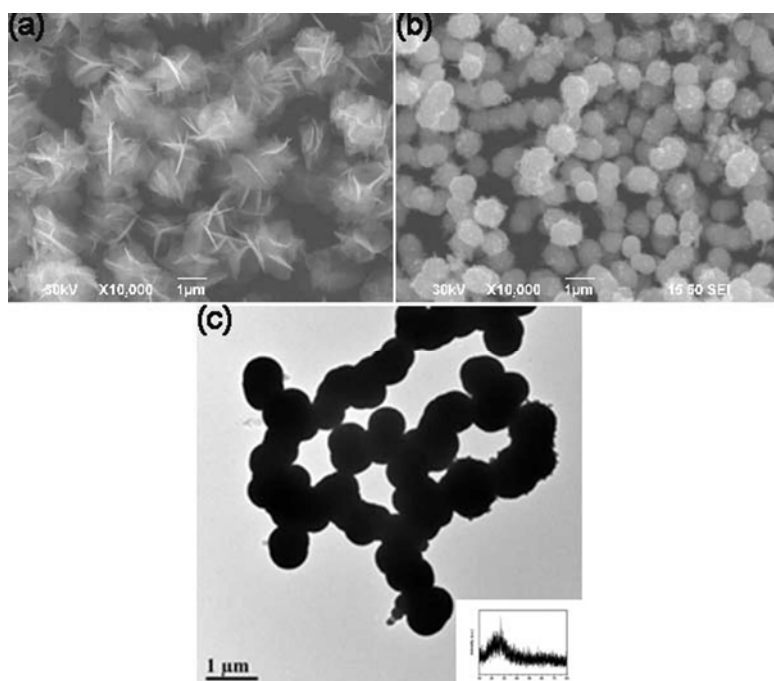

Figure S2 SEM and TEM images of R-2 (a) and N-2 (b,c) samples, suggesting the rose-like hierarchitectures with smaller diameter for R-2 compared with R-1, and amorphous N-2 with much larger diameter compared with N-1.

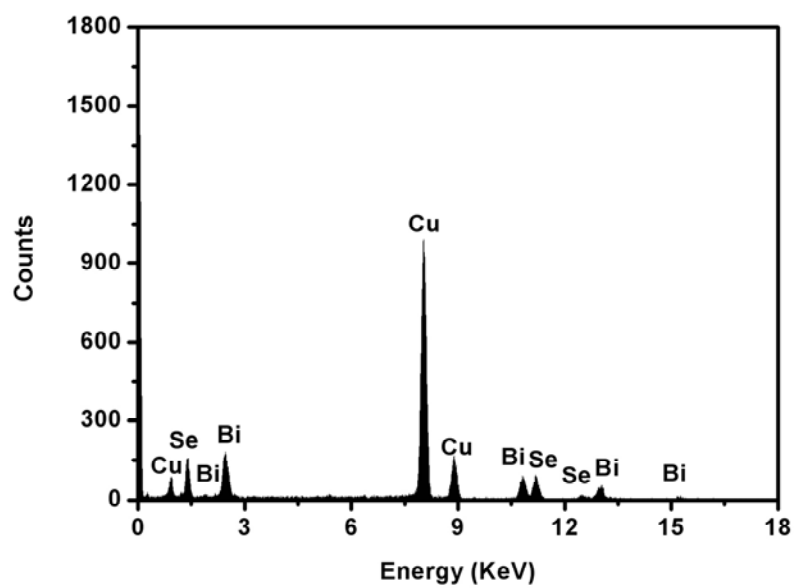

Figure S3 EDX spectrum of the amorphous spheres, confirming the chemical composition of the amorphous spheres with Bi/Se ratio close to 2:3.
